# Supplementary material for: Patterns and predictors of co-morbidities in Tuberculosis: A cross-sectional study in the Philippines
Source: PubMed Central journal article supplement (PMC7058028; doi:10.1038/s41598-020-60942-2), 2020-03-05
Supplement: 41598_2020_60942_MOESM1_ESM.pdf [file 41598_2020_60942_MOESM1_ESM.pdf]

**Supplementary Information:**

**Patterns and predictors of co-morbidities in Tuberculosis: A cross-sectional study in the Philippines**

Laura V White, Tansy Edwards, Nathaniel Lee, Mary C Castro, Naomi R Saludar, Rugaiya W Calapis, Benjamin N Faguer, Nelson Dela Fuente, Ferdinand Mayoga, Nobuo Saito, Koya Ariyoshi, Anna Marie Celina G Garfin, Juan A Solon & Sharon E Cox.

**Supplementary Table 1. Prevalence and pattern of co-morbidities by area in complete dataset including HIV and reported hypertension.**

| Number of comorbidities                           | Undernutrition | Diabetes | Moderate/severe anaemia | Reported hypertension | HIV | n (%)      |
|---------------------------------------------------|----------------|----------|-------------------------|-----------------------|-----|------------|
| <b>Urban/Metro Manila<sup>1</sup>: N=290</b>      |                |          |                         |                       |     |            |
| 0                                                 | No             | No       | No                      | No                    | No  | 128 (44.1) |
| 1                                                 | No             | No       | No                      | No                    | Yes | 54 (18.6)  |
| 1                                                 | Yes            | No       | No                      | No                    | No  | 32 (11.0)  |
| 1                                                 | No             | No       | No                      | Yes                   | No  | 14 (4.8)   |
| 1                                                 | No             | Yes      | No                      | No                    | No  | 13 (4.5)   |
| 1                                                 | No             | No       | Yes                     | No                    | No  | 11 (3.8)   |
| 2                                                 | Yes            | No       | Yes                     | No                    | No  | 8 (2.8)    |
| 2                                                 | Yes            | No       | No                      | No                    | Yes | 7 (2.4)    |
| 2                                                 | No             | No       | Yes                     | No                    | Yes | 7 (2.4)    |
| 2                                                 | No             | Yes      | No                      | Yes                   | No  | 4 (1.4)    |
| 2                                                 | No             | Yes      | Yes                     | No                    | No  | 3 (1.0)    |
| 2                                                 | No             | No       | Yes                     | Yes                   | No  | 2 (0.7)    |
| 2                                                 | No             | Yes      | No                      | No                    | Yes | 1 (0.3)    |
| 2                                                 | No             | No       | No                      | Yes                   | Yes | 1 (0.3)    |
| 3                                                 | Yes            | No       | Yes                     | No                    | Yes | 4 (1.4)    |
| 3                                                 | Yes            | No       | Yes                     | Yes                   | No  | 1 (0.3)    |
| <b>Rural/Negros Occidental<sup>1</sup>: N=261</b> |                |          |                         |                       |     |            |
| 0                                                 | No             | No       | No                      | No                    | -   | 130 (44.8) |
| 1                                                 | Yes            | No       | No                      | No                    | -   | 47 (16.2)  |
| 1                                                 | No             | No       | Yes                     | No                    | -   | 23 (7.9)   |
| 1                                                 | No             | Yes      | No                      | No                    | -   | 16 (5.5)   |
| 1                                                 | No             | No       | No                      | Yes                   | -   | 13 (4.5)   |
| 2                                                 | Yes            | No       | Yes                     | No                    | -   | 13 (4.5)   |
| 2                                                 | No             | Yes      | No                      | Yes                   | -   | 6 (2.1)    |
| 2                                                 | No             | No       | Yes                     | Yes                   | -   | 4 (1.4)    |
| 2                                                 | Yes            | No       | No                      | Yes                   | -   | 3 (1.0)    |
| 2                                                 | Yes            | Yes      | No                      | No                    | -   | 2 (0.7)    |
| 2                                                 | No             | Yes      | Yes                     | No                    | -   | 2 (0.7)    |
| 3                                                 | No             | Yes      | Yes                     | Yes                   | -   | 1 (0.3)    |
| 3                                                 | Yes            | No       | Yes                     | Yes                   | -   | 1 (0.3)    |

<sup>1</sup> number of participants with non-missing values for each co-morbidity shown

**Supplementary Table 2. Waist-to-hip ratio as a predictor of diabetes**

| Waist-to ratio threshold | Sensitivity               | Specificity               | Positive predictive value | Negative predictive value | False negative rate       |
|--------------------------|---------------------------|---------------------------|---------------------------|---------------------------|---------------------------|
| <b>All:</b>              |                           |                           |                           |                           |                           |
| 0.70                     | 1.00 (0.93 - 1.00)        | 0.01 (0.00 - 0.02)        | 0.09 (0.07 - 0.12)        | 1.00 (0.48 - 1.00)        | 0.00 (0.00 - 0.07)        |
| 0.75                     | 1.00 (0.93 - 1.00)        | 0.06 (0.04 - 0.09)        | 0.10 (0.07 - 0.13)        | 1.00 (0.90 - 1.00)        | 0.00 (0.00 - 0.07)        |
| 0.80                     | 0.96 (0.87 - 1.00)        | 0.25 (0.22 - 0.29)        | 0.12 (0.09 - 0.15)        | 0.99 (0.95 - 1.00)        | 0.04 (0.00 - 0.13)        |
| <b>0.85</b>              | <b>0.87 (0.75 - 0.95)</b> | <b>0.54 (0.50 - 0.58)</b> | <b>0.16 (0.12 - 0.21)</b> | <b>0.98 (0.95 - 0.99)</b> | <b>0.13 (0.05 - 0.25)</b> |
| 0.90                     | 0.59 (0.45 - 0.72)        | 0.78 (0.74 - 0.82)        | 0.21 (0.15 - 0.29)        | 0.95 (0.93 - 0.97)        | 0.41 (0.28 - 0.55)        |
| 0.95                     | 0.28 (0.16 - 0.42)        | 0.93 (0.90 - 0.95)        | 0.28 (0.17 - 0.42)        | 0.93 (0.90 - 0.95)        | 0.72 (0.58 - 0.84)        |
| 1.00                     | 0.07 (0.02 - 0.18)        | 0.99 (0.97 - 0.99)        | 0.33 (0.10 - 0.65)        | 0.91 (0.89 - 0.93)        | 0.93 (0.82 - 0.98)        |
| 1.05                     | 0.00 (0.00 - 0.07)        | 0.99 (0.98 - 1.00)        | 0.00 (0.00 - 0.71)        | 0.91 (0.88 - 0.93)        | 1.00 (0.93 - 1.00)        |
| 1.10                     | 0.00 (0.00 - 0.07)        | 0.99 (0.98 - 1.00)        | 0.00 (0.00 - 0.71)        | 0.91 (0.88 - 0.93)        | 1.00 (0.93 - 1.00)        |
| <b>Female:</b>           |                           |                           |                           |                           |                           |
| 0.70                     | 1.00 (0.80 - 1.00)        | 0.03 (0.01 - 0.06)        | 0.10 (0.06 - 0.16)        | 1.00 (0.40 - 1.00)        | 0.00 (0.00 - 0.20)        |
| 0.75                     | 1.00 (0.80 - 1.00)        | 0.17 (0.11 - 0.23)        | 0.12 (0.07 - 0.18)        | 1.00 (0.87 - 1.00)        | 0.00 (0.00 - 0.20)        |
| 0.80                     | 1.00 (0.80 - 1.00)        | 0.40 (0.32 - 0.48)        | 0.15 (0.09 - 0.23)        | 1.00 (0.94 - 1.00)        | 0.00 (0.00 - 0.20)        |
| <b>0.85</b>              | <b>0.94 (0.71 - 1.00)</b> | <b>0.68 (0.60 - 0.75)</b> | <b>0.24 (0.15 - 0.36)</b> | <b>0.99 (0.95 - 1.00)</b> | <b>0.06 (0.00 - 0.29)</b> |
| 0.90                     | 0.59 (0.33 - 0.82)        | 0.84 (0.77 - 0.89)        | 0.29 (0.15 - 0.46)        | 0.95 (0.90 - 0.98)        | 0.41 (0.18 - 0.67)        |
| 0.95                     | 0.29 (0.10 - 0.56)        | 0.96 (0.92 - 0.99)        | 0.45 (0.17 - 0.77)        | 0.93 (0.87 - 0.96)        | 0.71 (0.44 - 0.90)        |
| 1.00                     | 0.06 (0.00 - 0.29)        | 0.97 (0.94 - 0.99)        | 0.20 (0.01 - 0.72)        | 0.90 (0.85 - 0.94)        | 0.94 (0.71 - 1.00)        |
| 1.05                     | 0.00 (0.00 - 0.20)        | 0.99 (0.96 - 1.00)        | 0.00 (0.00 - 0.98)        | 0.90 (0.85 - 0.94)        | 1.00 (0.80 - 1.00)        |
| 1.10                     | 0.00 (0.00 - 0.20)        | 0.99 (0.96 - 1.00)        | 0.00 (0.00 - 0.98)        | 0.90 (0.85 - 0.94)        | 1.00 (0.80 - 1.00)        |
| <b>Male:</b>             |                           |                           |                           |                           |                           |
| 0.70                     | 1.00 (0.91 - 1.00)        | 0.00 (0.00 - 0.01)        | 0.09 (0.06 - 0.12)        | 1.00 (0.03 - 1.00)        | 0.00 (0.00 - 0.09)        |
| 0.75                     | 1.00 (0.91 - 1.00)        | 0.02 (0.01 - 0.04)        | 0.09 (0.06 - 0.12)        | 1.00 (0.63 - 1.00)        | 0.00 (0.00 - 0.09)        |
| 0.80                     | 0.95 (0.82 - 0.99)        | 0.19 (0.15 - 0.24)        | 0.10 (0.07 - 0.14)        | 0.97 (0.91 - 1.00)        | 0.05 (0.01 - 0.18)        |
| <b>0.85</b>              | <b>0.84 (0.68 - 0.94)</b> | <b>0.48 (0.43 - 0.53)</b> | <b>0.14 (0.09 - 0.19)</b> | <b>0.97 (0.93 - 0.99)</b> | <b>0.16 (0.06 - 0.32)</b> |
| 0.90                     | 0.59 (0.42 - 0.75)        | 0.76 (0.71 - 0.80)        | 0.19 (0.13 - 0.28)        | 0.95 (0.92 - 0.97)        | 0.41 (0.25 - 0.58)        |
| 0.95                     | 0.27 (0.14 - 0.44)        | 0.92 (0.88 - 0.94)        | 0.24 (0.12 - 0.39)        | 0.93 (0.90 - 0.95)        | 0.73 (0.56 - 0.86)        |
| 1.00                     | 0.08 (0.02 - 0.22)        | 0.99 (0.97 - 1.00)        | 0.43 (0.10 - 0.82)        | 0.92 (0.89 - 0.94)        | 0.92 (0.78 - 0.98)        |
| 1.05                     | 0.00 (0.00 - 0.09)        | 0.99 (0.98 - 1.00)        | 0.00 (0.00 - 0.84)        | 0.91 (0.88 - 0.94)        | 1.00 (0.91 - 1.00)        |
| 1.10                     | 0.00 (0.00 - 0.09)        | 0.99 (0.98 - 1.00)        | 0.00 (0.00 - 0.84)        | 0.91 (0.88 - 0.94)        | 1.00 (0.91 - 1.00)        |

**Supplementary Figure 1. Number of persons with TB with co-morbidities\*, overall and by area**

All available data: 218/584 (37.3%) have  $\geq 1$  comorbidity

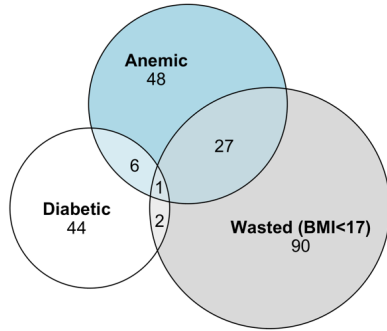

Negros Occidental: 118 / 261 (45.2%) have  $\geq 1$  comorbidity

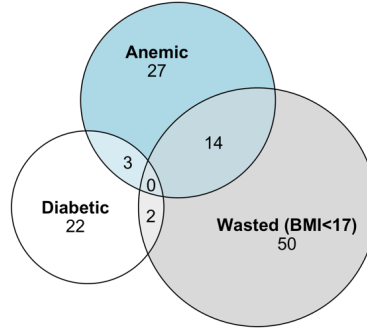

Metro Manila: 100/323 (31.0%) have  $\geq 1$  comorbidity

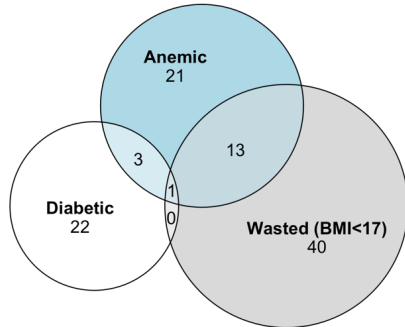

Metro Manila: 93/290 (32.1%) with known HIV status have  $\geq 1$  comorbidity

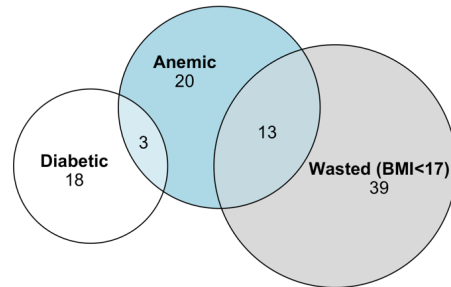

Metro Manila: 148/290 (51.0%) with known HIV status have  $\geq 1$  of four comorbidities including HIV

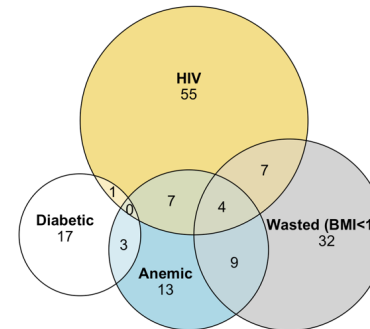

\* amongst participants with non-missing values for each comorbidity shown
